# Supplementary material
Source: PubMed Central journal article supplement (PMC2825282)

A. Iqg1p

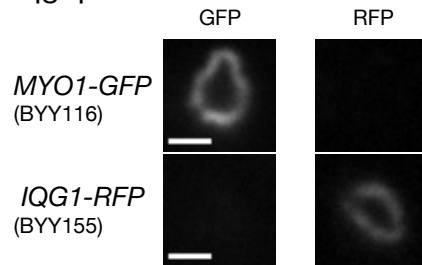

B. Before actin (rhodamine phalloidin) stain

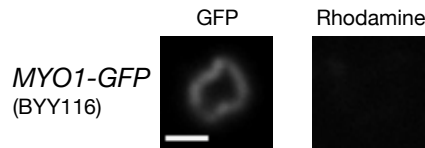

C. Before Mlc2p antibody stain (rhodamine)

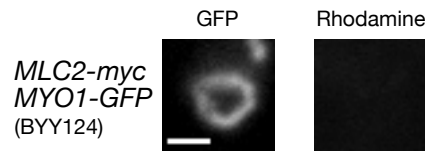

D. Before Hof1p antibody stain (rhodamine)

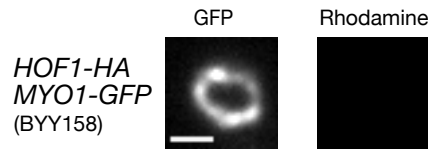

Hof1 antibody staining (rhodamine);  
Myo1p untagged

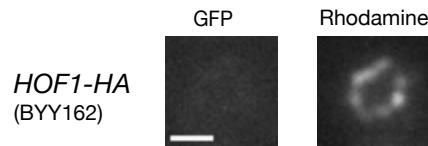

F. Before Cdc11p antibody stain (rhodamine)

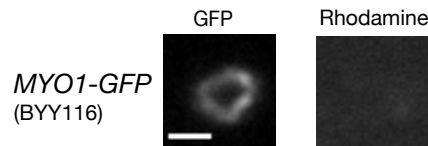

Supplement: NIHMS162465-supplement-Supp_Fig_s2.pdf [file NIHMS162465-supplement-Supp_Fig_s2.pdf]
