# Supplementary material
Source: PubMed Central journal article supplement (PMC2825282)

A. Mlc2p

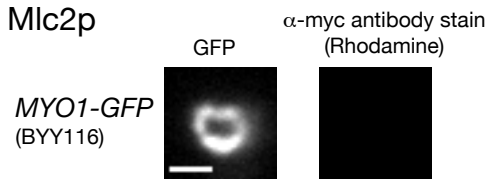

B. Hof1p

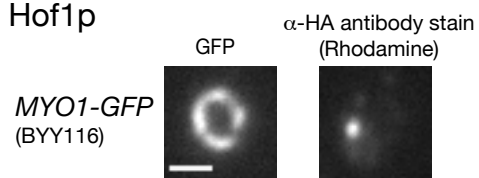

Supplement: NIHMS162465-supplement-Supp_Fig_s1.pdf [file NIHMS162465-supplement-Supp_Fig_s1.pdf]

A.

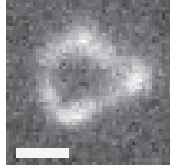

B.

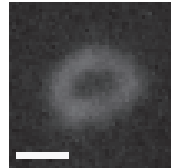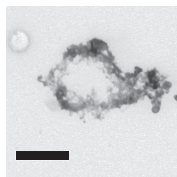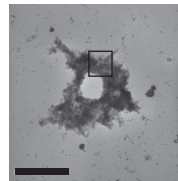

C.

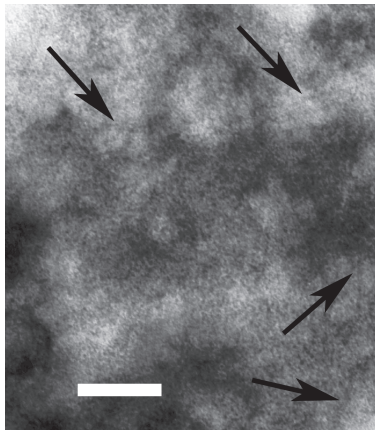

Supplement: NIHMS162465-supplement-Supp_Fig_s3.pdf [file NIHMS162465-supplement-Supp_Fig_s3.pdf]
